# Supplementary material
Source: HighWire-hosted journal article supplement (https://bibliotheek.ehb.be/content/60/4/406)
Supplement: inline-supplementary-material-1 [file inline-supplementary-material-1.xlsx]

## Sheet: All patients and HPOs
	TOTAL	Schaaf et al., 2013	Soden et al., 2014	Mejlachowicz et al., 2015	Fountain et al., 2016		Palomares-Bralo et al., 2017	Urreizti et al., 2017	Bayat et al., 2018	Enya et al., 2018	Hidalgo-Santos et al., 2018	Kleinendorst et al., 2018	Matuszewska et al., 2018	McCarthy et al., 2018	McCarthy et al., 2018	Poliak et al., 2018	Tong et al., 2018	Jobling et al., 2018	Gregory et al., 2019	Negishi et al., 2019	Patak et al., 2019		Xiao et al., 2019	Guo et al., 2019	de Andrade et al., 2020	Chen et al., 2020	Ahn et al., 2020	Marbach et al., 2020	Llamos-Paneque et al., 2020	Halloun et al., 2021	Duan et al., 2021	Nunes et al., 2021	Bertoli-Avella et al., 2021	Laquerriere et al., 2021
Diagnosis		SYS	SYS	Lethal AMC	SYS/AMC		SYS	SYS	SYS	SYS	SYS	SYS	SYS	SYS	SYS	SYS	SYS	CHS-> SYS	SYS	SYS	SYS	SYS like (mild)	SYS	AMC	SYS	SYS	SYS	SYS	SYS	SYS	SYS	SYS	SYS	AMC/SYS
New described cases	135	4	2	4	16	Patients 5 and 6	1	1	1	3	1	1	2	2	35	1	2	6	4	6	4	1 (Missense)	5	1	1	2	4	8	1	1	1	1	2	9
Gender	46F; 40M; 49UnK	4M	2F	3F; 1M	2F; 3M; 11UnK	1M; 1F	M	F	M	2F; 1M	F	F	2F	2F	NS	F	1F; 1M	6F	3F; 1M	1F; 5M	2F; 2M	F	2F; 3M	M	M	2F	3M; 1F	4F; 4M	M	F	M	M	NA	4F; 4M; 1UnK
Protein change		p.Val551Aspfs*151; p.Pro601Glnfs*101; p.Ile1061Hisfs*7; p.Gln1042*	p.Gln666Profs*47	p.Gln666Serfs*36 (x3); p.Leu708Trpfs*7	p.Gln666Profs*47 among others	p.Gln666Serfs*36 (x2)	p.Gln666Profs*47	p.Gln638*	p.Gln666Profs*47	p.Ser1044*; p.Gln638* (x2)	p.Gln1007*	p.Trp617*	p.Gln666Hisfs*37; p.Trp965*	p.Gln666Profs*47 (x2)	NS	p.Gln638*	p.Pro543Leufs*159; p.Gln666Profs*47	p.Gln666Profs*47; p.Asp727Profs*6(x2); p.Gln588*(x2); p.Ala966fs	p.Gln666Profs*47	p.Gln638*(x2); p.Trp587*; p.Gln666Profs*47; p.Gln588*(x2)	p.Val1041Alafs*7; p.Gln666Profs*47; p.Glu1057*; p.Gln666Hisfs*37	p.Ala538Glu	p.Gln666Profs*47	p.Gln666Serfs*36	p. Val701Glyfs*12	p.Gln666Profs*47	p.Gln666Profs*47(x2); p.Lys740Argfs*11; p.Phe1150Trpfs*4	p.Pro597Hisfs*105; p.Pro601Glnfs*101; p.Gln607*; p.Gln666Profs*47; p.Ser724_Ala744dup; p.Arg941Profs*10; p.Trp958*; p.Ser987Alafs*5	p.Leu1059Phefs*2	p.Gln638*	p.Gln563*	p.Gln666Profs*47	p.Ser603*	p.Gln666Serfs*36(x5); p.Gln666Profs*47(x2); p.Leu708Trpfs*7; p.Val991*
Inheritance		de novo (x3), ? (x1)	gonadal mosaicism	Inherited (x3); de novo		Inherited (x2)	inherited	de novo	?	Inherited (x2); de novo	de novo	Inherited	de novo	de novo	?	inherited	inherited; de novo	inherited (x1); ? (x3); de novo (x2)	de novo(x2); ? (x2) (non-identical twins)	?; de novo (x3); inherited (x2)	de novo(x2); inherited (x1); 4% paternal mosaicism	inherited	inherited	inherited	Inherited	de novo (x2)	de novo (x2); Inherited (x2)	de novo (x3); Inherited (x2); unknown (x3)	inherited	de novo	?	?	?	Inherited (x5), de novo (x4)
Cognitive/Neurologic/Behavioural
Developmental delay	101/101	4/4	2/2		14/14		1/1	1/1	1/1	3/3	1/1	1/1	2/2	2/2	35/35	1/1	2/2	6/6	4/4	6/6	4/4	1/1				2/2	4/4		1/1			1/1	2/2
Intellectual disability	87/87	4/4	2/2		14/14		1/1	1/1	1/1	3/3	1/1	1/1	2/2	2/2	34/34			6/6		5/5	4/4	1/1					4/4				1/1
ASD Diagnosis	55/76	4/4	2/2		4/7 (6 more patients express symptoms)					1/3	1/1 (signs)		2/2 (signs)	2/2	25/32			1/1	1/4	1/1	3/4	1/1					2/4	4/7	1/1
Full Scale IQ (avg.)														8.00	59.60
Seizures	24/40	1/4	1/2		2/13		1/1			2/3				1/2	7/34	1/1	2/2			2/6	2/4					1/2	1/4		0/1		0/1
Sleep apnea	53/66	2/4			9/13			1/1				1/1	2/2	2/2	22/28	1/1	1/2		4/4	1/5	2/4							5/8	0/1
Sleep disturbance	5/5							1/1					1/1			1/1		2/2
Brain MRI findings	20/32	1/1						1/1	1/1	2/3	0/1		0/1			1/1	0/1	4/4	2/4	2/2	2/4	1/1		1/1?		0/2	2/4
Self-injorious behavior/Skin picking	16/21	2/4			7/12														1/4	4/6	1/4	1/1
Aggressive behavior	4/14																	1/1			0/4	1/1						2/8
Behavioral abnormalities (impulsivity, compulsitivity…)	13/13	2/4			9/11																							2/8
Temper tantrums, agressivity	7/17	2/4																		1/5								4/8
Infantile lethargy, weak cry	14/22	3/4	1/2							2/3						1/1				5/6	1/4					1/2
Neurological deterioration following Febrile illness	5/8																1/2			4/6
Speech articulation defects	6/8	3/4															1/2	1/1											1/1
Pregnancy complications	4/10									0/3	0/1										4/4					0/2
Decreased fetal movement	18/33			4/4	6/15	2/2						1/1					1/2	1/5			1/4	0/1						2/8				0/1
Prenatal or perinatal death	7/7			4/4		2/2																		1/1
Polyhydramnios	12/20			4/4									1/2						2/4		2/4			1/1			1/4					1/1
Respiratory distress	57/72		2/2	1/1				1/1	1/1	3/3	1/1	1/1	2/2	2/2	22/35	1/1		4/6	4/4		4/4		5/5		1/1	2/2
Apneic episodes	11/18												2/2			1/1		1/6					5/5				2/4
Intubation	22/47													2/2	15/34			1/6			3/4				1/1
Mechanical Ventilator	44/72								1/1	3/3		1/1	2/2	2/2	15/35	1/1	1/2				3/4		5/5		1/1	2/2	3/4	4/8	0/1
Tracheostomy	16/20									2/2			2/2	0/1	5/34		1/2		3/4		3/4								0/1
Dyspnea	2/2																2/2
Neonatal pneumonia	7/8										1/1												4/5		1/1					1/1
Recurrent respiratory infections	5/6							1/1		2/3	1/1					1/1
Feeding issues	93/106	3/4	2/2		15/16		1/1	1/1	1/1	3/3	1/1	1/1	2/2	2/2	33/35	1/1	2/2	4/6	1/4	6/6	2/4		5/5	1/1	1/1	2/2	3/4				0/1
Poor suck in infancy	78/88	3/4	2/2		14/15		1/1				1/1		2/2	1/1	33/35	1/1	1/1			6/6	2/4					2/2	2/4	6/8	1/1
Dysphagia	35/49							1/1		1/3	1/1		1/2	1/1	27/35	1/1					1/4								1/1
Hyperphagia	13/14	2/4			4/13							0/1		0/1	7/34														0/1
Use of ng tube	39/63	2/4							1/1			1/1		1/1	22/34	1/1	1/2			4/6 (not specified)							2/4	4/8	0/1
Use of g tube	27/54								1/1				2/2	2/2	14/33	1/1		2/6			2/4				1/1	1/2			0/1	1/1
Excessive weight gain or obesity	23/35	3/4			5/13				0/1			1/1 (severe truncal obesity)		0/1	6/35					3/6	1/4							3/8	0/1		1/1
Gastroesophageal Reflux	38/65				8/14						1/1			2/2	15/34	1/1		4/6	2/4		2/4				1/1	1/2	1/4		0/1		0/1
Chronic intestinal pseudo-obstruction	1/1								1/1
Chronic constipation	46/65				4/11		1/1		1/1					1/2	25/33			2/6	3/4		1/4						1/4	6/8	1/1
Physical characteristics
Hypotonia (at time of exam)	61/64				13/13						1/1	1/1		2/2	32/32	1/1		6/6	1/4		4/4
Neonatal hypotonia	63/72	3/4	2/2	1/1	14/15		1/1	1/1	1/1	3/3	1/1	1/1	2/2			1/1	2/2		1/3	6/6	4/4	0/1	4/5	1/1	1/1	2/2	3/4	6/8	1/1			1/1
Decreased muscle mass	2/3		1/2								1/1
Increased fatty tissue	6/8		1/2									1/1						3/4							1/1
Congenital distal contractures	96/109	2/4	2/2		15/18	2/2	1/1	1/1	1/1		1/1		2/2	2/2	31/35	1/1	2/2	6/6	4/4	6/6	3/4	1/1 (knee)		1/1		2/2	3/4	6/8	1/1
Arthrogryposis	21/30			4/4	2/18	2/2				3/3		1/1	2/2					1/1	4/4								1/4					1/1		2022-09-09
Flexion of elbows ans knees	4/7			3/3															1/4
Scoliosis	35/57	0/2			7/14	0/2				1/3				2/2	10/19			6/6	3/4		1/4	1/1						4/8	0/1		0/1
Kyphosis	6/19					0/2								1/1	4/19								1/5						0/1		0/1
Short neck	8/18		1/5	4/4								1/1						1/6								1/2
Short stature	35/52	2/4			10/16	0/2	1/1	1/1			1/1							6/6	4/4	5/6	1/4	0/1					2/4			1/1	1/1
Hypogonadism	41/44	3/4			8/11 (M); 1/1 (F)	0/2	1/1	1/1		1/2	0/1			0/1	9/35	1/1	1/1			4/6	2/2	0/1	3/3	1/1				3/8	1/1		1/1			2022-01-01
Cryptorchidism	8/13	2/4					1/1		1/1	1/2							1/1		1/1		1/2	0/1
Eye abnormalities	36/44	3/4	1/1		11/14			1/1	1/1 (strabismus)		1/1 (strabismus)					1/1		3/6	4/4	5/6	4/4	1/1
Microcephaly	3/5															1/1											2/4
Macrocephaly	4/13																		2/4		0/4	1/1					1/4
Short limbs	2/3																								1/1	1/2
Small Hands	30/49	1/4			12/14			1/1								1/1			1/4	6/6	1/4	0/1	2/5			1/2	1/4				1/1		2/2
Cranofacial disproportion	1/1																								1/1
Camptodactyly	27/41	2/4		4/4	1		1/1	1/1	1/1	3/3								3/6	1/4		2/4	0/1	5/5			1/2	2/4
Polydactyly	1/5																						1/5
Bilateral ulnar deviation	4/10	1/4																3/6
Tappering fingers	14/26	1/4			1		1/1				1/1							1/6		4/6	3/4	0/1				2/2
Lateral deviation of wrists	1/1																								1/1
Small Feet	15/31	1/4			8/15	0/2										1/1			1/4		1/4	0/1	1/5				1/4				1/1
Bilateral club foot	13/28			4/4				1/1		1/3			1/2					2/6			1/4	0/1				1/2	1/4					1/1
Equinovarus feet	2/5										1/1																1/4
Abnormality of the skin	1/2																1/2
Hypopigmentation	4/6																			4/6
Hirsutism	2/5																				1/4	1/1
Facial dysmorphisms	70/76	4/4	2/2	4/4	16/18 (malformations of the philtrum, ear position, nasal structure, frontal bossing and palpebral fissure length)	2/2	1/1	1/1	1/1	3/3	1/1	1/1	2/2			1/1	1/2	6/6	4/4	4/6	4/4	1/1	4/5		1/1	2/2	4/4
Wide mouth	4/7	2/4						1/1																		1/2
Small mouth	3/8								1/1				1/2					1/5
Down-turned mouth corners	2/5																	2/5
Thick vermillion upper and lower lip	2/5																				1/4	1/1
Limited opening of the mouth	1/1											1/1
High arched palate	15/33		2/2						1/1	1/3			1/2					1/5	3/4		1/4	0/1	3/5			1/2	1/4
Cleft palate	3/8									1/3											1/4	1/1
Thick palatal ridges	1/1							1/1
Glossoptosis	2/5																		1/4						1/1
Widely spaced teeth	3/11						1/1											1/5			1/4	0/1
Teeth malposition	1/1							1/1
Toothed gum	2/7																						1/5			1/2
Shallow nasolabial fold	4/6																			4/6
Broad nasal root	10/17						1/1		1/1 (prominent)	1/3								4/5			1/4	0/1				2/2
Depressed nasal root	3/8									1/3																	1/4			1/1
High nasal bridge	3/7												2/2								0/4	1/1
Wide nasal bridge	2/10																	1/5			1/4	0/1
Flat nasal bridge
Depressed nasal bridge	1/5																	1/5
Short nose	2/6							1/1										1/5
Anteverted nares	3/6							1/1										2/5
Large and broad nose	1/4	1/4
Smooth philtrum	4/6		2/2							1/3															1/1
Deep philtrum	2/6						1/1														1/4	0/1
Short philtrum	1/5																				0/4	1/1
Long philtrum	2/7																	1/5								1/2
Ptosis	2/2		2/2
Microphtalmos
Hyperthelorism	8/17			3/4						1/3								1/5			2/4	1/1
Deep set eyes	5/10								1/1									3/5			1/4
Prominent epicanthic folds	3/7												1/2								1/4	1/1
Telecanthus	2/5																				1/4	1/1
Upslanting palpebral fissures	2/3											1/1	1/2
Downslanting palpebral fissures	2/5																				1/4	1/1
Narrow palepbral fissures	5/11			3/4									1/2					1/5
Almond-shaped palpebral fissures	4/10	1/4								1/3																1/2				1/1
Low set ears	15/24						1/1			1/3			2/2			3/5	1/2	3/5			2/4	1/1								1/1
Large ears	9/18								1/1									1/5		4/6						1/2	2/4
Bitemporal narrowing	8/20	1/4											2/2					1/5	3/4		1/4	0/1
Frontal bossing	10/25																	2/5	2/4		1/4	0/1	2/5				1/4						2/2
Microretrognathia	6/10			4/4																			1/5							1/1
Retrognathia	7/7								1/1									5/5							1/1
Micrognathia	16/26									3/3	1/1		1/2			1/1	1/2		4/4		2/4	0/1	1/5		1/1	1/2
Mandibular malformations	1/1																							1/1
Bulbar palsy	1/4																		1/4
Scaphocephaly	3/5								1/1										2/4
Dolicocephaly	2/6						1/1														1/4	0/1
Brachycephaly	1/5																	1/5
Trigonocephaly	2/6							1/1										1/5
Ridge over the metopic suture	6/7																	5/5								1/2
Broad forehead	1/1										1/1
High forehead	4/12																	1/5			1/4	0/1				2/2
Prominent forehead	4/14																	1/5	2/4		1/4	0/1
Flat forehead	2/5																	2/5
Square-shaped face	2022-06-02											1/1						1/5
Long face	4/4																		4/4
Pierre Robin sequence	1/5																						1/5
Horizontal chin crease	1/1											1/1
Endocrinological issues	0/1											0/1
Hypopituarism	6/12									1/3	1/1					1/1					1/4	0/1											2/2	2022-01-01
Growth Hormone deficency	18/24									1/3	1/1							6/6	4/4	3/3	1/4	0/1							1/1	1/1
Hypothyroidism	8/28								1/1	1/3	1/1							1/5			1/4	0/1					0/4	3/8		0/1
Hypoglycemia	14/22		2/2				1/1									1/1	1/2	5/6	1/1		2/4	0/1					0/2		0/1	1/1
Diabetes insipidus	4/16									1/3									2/4									0/8		1/1
Other endocrinological issues	9/9									2/3	1/1								3/4		3/4	0/1
Other alterations
Heart defects	7/19															1/1		2/6	1/4		0/4	1/1				2/2				0/1
Bradycardia	3/4		1/2					1/1																	1/1
Tracheomalacia	1/5																				0/4	1/1
Jaundice	3/11																	2/6			0/4	1/1
Miopathy	1/1																	1/1
Skeletal abnormalities	1/5																				1/4	0/1
Normal pathological examination of brain, spinal cord…	4/4			4/4
Temperature instability	37/45				6/13			1/1	0/1					1/2	27/35	1/1													1/1		0/1
Excessive salivation	1/1							1/1
Premature death	23			4/4		2/2						1/1					2/2						5/5 (apneic episodes)	Prenatal death		2/2								6

## Sheet: Publications
Authors	Publication Year	PMID	Clinical Diagnosis	Number of patients	Comments
Schaaf et al.	2013	24076603	SYS	4	Full clinical description in Supplementary note
Soden et al.	2014	25473036	SYS	2	2/119 NDD patients. Scarce clinical description
Mejlachowicz et al.	2015	26365340	AMC	4
Fountain et al.	2016	27195816	SYS / AMC	18
Palomares-Bralo et al.	2017	28640240	SYS	1
Urreizti et al.	2017	28281571	SYS	1
Bayat et al.	2018	29660409	SYS	1
Enya et al.	2018	29359444	SYS	3
Hidalgo-Santos et al.	2018	30323850	SYS	1
Kleinendorst et al.	2018	30238631	SYS	1
Matuszewska et al.	2018	29389715	SYS	2
McCarthy et al.	2018	29496979	SYS	2	They do a hormonal study in 9 patients, but only 2 fo them (patients 2 and 4) had not described before.
McCarthy et al.	2018	30302899	SYS	35	They say that in Fountain et al. they describe 28 new patients, but there are actually 18
Poliak et al.	2018		SYS	1	Not in pubmed. DOI: 10.15406/jpnc.2018.08.00312
Tong et al.	2018	29581464	SYS	2	They die at few months of age, they do not specify the exact age
Jobling et al.	2018	29599419	CHS	6	Previously reported in original Chitayat: 1 case of 22kb inersion & 3kb deletion- removes las 852 bp & 3'-UTR (mild ID & DD)
Guo et al.	2019	31152388	AMC	1	Perinatal death (c.1996 AD). 4 fetuses with deformities + 2 abortions, but there is only a genetic diagnosis for the last one.
Gregory et al.	2019	31504653	SYS	4	They emphasize the importance of the endocrionological profile
Negishi et al.	2019	31791363	SYS	6
Patak et al.	2019	31397880	SYS	5	One missense mutation
Xiao et al.	2019	32021601	SYS	5	same family, 5 cases c.1996dupC
de Andrade et al.	2020		SYS	1	Not in pubmed. https://doi.org/10.5348/101144z01ga2020cr
Chen et al.	2020	32702813	SYS	2
Ahn et al	2020	33371171	SYS	4
Marbach et al.	2020	33076953	SYS	8
Llamos-Paneque et al.	2020		SYS	1	Not in PUBMED. DOI: 10.37421/jmgm.2020.14.452
Duan et al.	2021	34128869	SYS	1
Halloun et al.	2021	34051361	SYS	1
Nunes et al.	2021	35047255	SYS	1
Bertoli-Avella et al.	2021	32860008	SYS	2	2 of 1007 patients. Scarce clinical description. Phenotipe briefly described in supplementary material.
Laquerriere et al.	2021	33820833	SYS/AMC	9	Scarce phenotypical description (note very useful, included in figure)
Total SYS (CHS) patients	122
Total AMC patients	13
TOTAL	135
