# Supplementary material
Source: HighWire-hosted journal article supplement (https://bibliotheek.ehb.be/content/60/4/406)
Supplement: inline-supplementary-material-5 [file inline-supplementary-material-5.xlsx]

## Sheet: Suppl. Table 4
Supplementary Table 4. Full list of mutations depicted in Figure 2.
cDNA change	Protein Change	Reported phenotype	Number of individuals	Publication	Comments
NM_019066.5:c.1580delC	p.Pro527Argfs*175	SYS	1	Fountain et al., 2016
NM_019066.5:c.1613C>A	p.Ala538Glu	mild SYS	1	Patak et al., 2019	It is already described as missense in the paper.
NM_019066.5:c.1621C>T	p.Gln541*	SYS	1	Fountain et al., 2016
NM_019066.5:c.1628delC	p.Pro543Leufs*159	SYS	1	Tong et al., 2018
NM_019066.5:c.1652delT	p.Val551Aspfs*151	SYS	1	Schaaf et al., 2013
NM_019066.5:c.1687C>T	p.Gln563*	SYS	1	Duan et al., 2021
NM_019066.5:c.1690C>G	p.Pro564Ala	SYS	1	McCarthy et al., 2018
NM_019066.5:c.1761G>A	p.Trp587*	SYS	1	Negishi et al., 2019
NM_019066.5:c.1762C>T	p.Gln588*	Chitayat-Hall (SYS)	4	Jobling et al., 2018; Negishi et al., 2019
NM_019066.5:c.1790delC	p.Pro597Hisfs*105	SYS	1	Marbach et al., 2020	ESHG Poster P08.100.A - The adult phenotype of Schaaf-Yang syndrome
NM_019066.5:c.1797_1810del	p.Glu599Aspfs*109	SYS	1	McCarthy et al., 2018	In the paper it is reported as c.1797_1820del (p.Ile600_Gln607del), but in HGMD is shown as c.1797_1810del (p.Glu599Aspfs*109) which correlates more with the SYS phenotype.
NM_019066.5:c.1800delT	p.Pro601Glnfs*101	SYS	1	Marbach et al., 2020	ESHG Poster P08.100.A - The adult phenotype of Schaaf-Yang syndrome
NM_019066.5:c.1801_1802del	p.Pro601Asnfs*111	SYS	1	Fountain et al., 2016
NM_019066.5:c.1802delC	p.Pro601Glnfs*101	SYS	1	Schaaf et al., 2013
NM_019066.5:c.1808C>G	p.Ser603*	SYS	1	Bertoli-Avella et al., 2021
NM_019066.5:c.1813G>T	p.Glu605*	SYS	1	McCarthy et al., 2018
NM_019066.5:c.1819C>T	p.Gln607*	SYS	1	Marbach et al., 2020	ESHG Poster P08.100.A - The adult phenotype of Schaaf-Yang syndrome
NM_019066.5:c.1850G>A	p.Trp617*	SYS	2	Kleinendorst et al., 2018	One of the patients is ours.
NM_019066.5:c.1900G>T	p.Glu634*	SYS	1	McCarthy et al., 2018
NM_019066.5:c.1906C>T	p.Gln636*	SYS	1	McCarthy et al., 2018
NM_019066.5:c.1912C>T	p.Gln638*	Opitz C/ MAGEL2 syndrome/ SYS	9	Urreizti et al., 2017; Fountain et al., 2016; Enya et al., 2018; Poliak et al., 2018; Negishi et al., 2019; Halloun et al., 2021; Stranneheim et al., 2021
NM_019066.5:c.1958_1962del	p.Pro653Leufs*58	SYS	2	McCarthy et al., 2018
NM_019066.5:c.1990_1991delinsA	p.Pro664Thrfs*38	SYS	1	McCarthy et al., 2018
NM_019066.5:c.1996delC	p.Gln666Serfs*36	AMC	13	Mejlachowicz et al., 2015; Fountain et al., 2016; McCarthy et al., 2018; Laquerriere et al., 2021; Guo et al., 2019
NM_019066.5:c.1996dupC	p.Gln666Profs*47	SYS; Chitayat-Hall	80	Soden et al., 2014; Fountain et al., 2016; Jobling et al., 2018; Palomares-Bralo et al., 2017; Matuszewska et al., 2018; McCarthy et al., 2018; Negishi et al., 2019; Patak et al., 2019 ; Gregory et al., 2019; Marbach et al., 2020; Chen et al., 2020; Ahn et al., 2020; Laquerriere et al., 2021; Nunes et al., 2021
NM_019066.5:c.1996_1997dup	p.Gln666Hisfs*37	SYS	1	Patak et al., 2019
NM_019066.5:c.1996C>T	p.Gln666*	SYS	2	McCarthy et al., 2018
NM_019066.5:c.2034delC	p.Thr679Hisfs*23	SYS	1	McCarthy et al., 2018	In the paper it is reported as c.224delC. Our hypothesis is that it was annotated in GRCh37.
NM_019066.5:c.2056_2066del	p.Trp686Alafs*23	SYS	1	McCarthy et al., 2018
NM_019066.5:c.2101dupG	p. Val701Glyfs*12	SYS	1	de Andrade et al., 2020
NM_019066.5:c.2105delC	p.Ala702Glufs*13	SYS	1	McCarthy et al., 2018	In the paper it is reported as c.2015delC, but in that position there is no C. In HGMD it is reported as c.2105delC (p.Ala702Glufs*13) which correlates with the SYS phenotype
NM_019066.5:c.2118delT	p.Leu708Trpfs*7	AMC/SYS	2	Mejlachowicz et al., 2015; Laquerriere et al., 2021
NM_019066.5:c.2113_2114del	p.Asn705Phefs*7	SYS	1	McCarthy et al., 2018
NM_019066.5:c.2153C>A	p.Ser718*	SYS	1	McCarthy et al., 2018
NM_019066.5:c.2163C>A	p.Cys721*	SYS	1	McCarthy et al., 2018
NM_019066.5:c.2170_2232dup	p.Ser724_Ala744dup	SYS	1	Marbach et al., 2020	ESHG Poster P08.100.A - The adult phenotype of Schaaf-Yang syndrome. Features suggestive of SYS.
NM_019066.5:c.2179_2180del	p.Asp727Profs*6	Chitayat-Hall (SYS)	2	Jobling et al., 2018
NM_019066.5:c.2199delA	p.Glu734Serfs*17	SYS	1	McCarthy et al., 2018	In the paper it is reported as c.390delA. It does not seem to be correctly annotated, in this position there is a G. Our hypothesis is that it could be annotated in GRCh37.
NM_019066.5:c.2216delC	p.Ser739*	SYS	1	Ahn et al., 2020	in the paper it is reported as c.2217delC, but we have corrected it as c.2216delC
NM_019066.5:c.2296C>T	p.Arg766*	SYS	1	McCarthy et al., 2018
NM_019066.5:c.2821dupC	p.Arg941Profs*10	SYS	1	Marbach et al., 2020	ESHG Poster P08.100.A - The adult phenotype of Schaaf-Yang syndrome
NM_019066.5:c.2861_2862insG	p.Ile954Metfs*30	SYS	1	McCarthy et al., 2018
NM_019066.5:c.2873G>A	p.Trp958*	SYS	3	Fountain et al., 2016; McCarthy et al., 2018; Marbach et al., 2020	Marbach: ESHG Poster P08.100.A - The adult phenotype of Schaaf-Yang syndrome
NM_019066.5:c.2894G>A	p.Trp965*	SYS	1	Matuszewska et al., 2018
NM_019066.5:c.2958delG	p.Ser987Alafs*5	SYS	2	McCarthy et al., 2018; Marbach et al., 2020
NM_019066.5:c.2970delC	p.Val991*	AMC	1	Laquerriere et al., 2021
NM_019066.5:c.2989G>A	p.Ala997Thr	SYS	1	McCarthy et al., 2018
NM_019066.5:c.3019C>T	p.Gln1007*	SYS	1	Hidalgo-Santos et al., 2018
NM_019066.5:c.3031A>T	p.Lys1011*	SYS	1	McCarthy et al., 2018
NM_019066.5:c.3070delG	p.Ala1024Glnfs*9	SYS	1	McCarthy et al., 2018
NM_019066.5:c.3122delT	p.Val1041Alafs*7	SYS	1	Patak et al., 2019
NM_019066.5:c.3124C>T	p.Gln1042*	SYS	3	Schaaf et al., 2013; McCarthy et al., 2018
NM_019066.5:c.3131C>A	p.Ser1044*	SYS	1	Enya et al., 2018
NM_019066.5:c.3164_3165del	p.Lys1055Argfs*2	SYS	1	Stranneheim et al., 2021
NM_019066.5:c.3169G>T	p.Glu1057*	SYS	1	Patak et al., 2019
NM_019066.5:c.3175_3176dup	p.Leu1059Phefs*2	SYS	1	Llamos-Paneque et al., 2020
NM_019066.5:c.3181_3182del	p.Ile1061Hisfs*7	SYS	1	Schaaf et al., 2013
NM_019066.5:c.3208G>T	p.Glu1070*	SYS	1	Bowling et al., 2017; McCarthy et al., 2018
NM_019066.5:c.3235G>T	p.Glu1079*	SYS	2	Fountain et al., 2016; McCarthy et al., 2018
NM_019066.5:c.3449_3450delTT	p.Phe1150Trpfs*4	SYS	1	Ahn et al., 2020
NM_019066.5:c.3607A>T	p.Lys1203*	SYS	1	McCarthy et al., 2018

## Sheet: Suppl. Table 5
Supplementary Table 5. Complete list of DEGs
Gene ID	Gene symbol	Combined FDR	Mean LogFCs
UPregulated
ENSG00000228630	HOTAIR	0.00000000	74697
ENSG00000256618	MTRNR2L1	0.00001135	55233
ENSG00000153707	PTPRD	0.00000123	46245
ENSG00000179542	SLITRK4	0.00880923	45239
ENSG00000244300	GATA2-AS1	0.00000000	43041
ENSG00000069011	PITX1	0.00816110	42342
ENSG00000163347	CLDN1	0.00000112	41450
ENSG00000159556	ISL2	0.00193059	40878
ENSG00000077092	RARB	0.01493986	40001
ENSG00000162738	VANGL2	0.00000081	39748
ENSG00000250133	HOXC-AS2	0.00000000	37501
ENSG00000114115	RBP1	0.00010963	36565
ENSG00000251151	HOXC-AS3	0.00002460	35799
ENSG00000170412	GPRC5C	0.00318874	35355
ENSG00000158258	CLSTN2	0.00001884	32582
ENSG00000205403	CFI	0.00481319	32156
ENSG00000176887	SOX11	0.00617501	31216
ENSG00000050344	NFE2L3	0.00406723	30615
ENSG00000118785	SPP1	0.00001245	29987
ENSG00000179348	GATA2	0.00002887	28457
ENSG00000165194	PCDH19	0.00016182	28371
ENSG00000189120	SP6	0.00048115	28068
ENSG00000110328	GALNT18	0.01328474	27797
ENSG00000145794	MEGF10	0.00006520	27100
ENSG00000145569	FAM105A	0.00486515	26858
ENSG00000158164	TMSB15A	0.00000078	26185
ENSG00000213190	MLLT11	0.00000008	25159
ENSG00000116741	RGS2	0.00007873	25044
ENSG00000144355	DLX1	0.00483280	25016
ENSG00000139364	TMEM132B	0.00011399	24618
ENSG00000122378	FAM213A	0.00287714	24111
ENSG00000146250	PRSS35	0.00561639	23849
ENSG00000260549	MT1L	0.00000992	21904
ENSG00000273038	AL365203.3	0.00000000	19057
ENSG00000151725	CENPU	0.00000002	18965
ENSG00000090530	P3H2	0.00086613	18937
ENSG00000149948	HMGA2	0.00670181	18504
ENSG00000131203	IDO1	0.00013629	18327
ENSG00000138135	CH25H	0.00008401	17432
ENSG00000156970	BUB1B	0.00373261	17240
ENSG00000104368	PLAT	0.00860139	17015
ENSG00000143228	NUF2	0.00632092	16711
ENSG00000114268	PFKFB4	0.00014643	16596
ENSG00000121621	KIF18A	0.00034690	16581
ENSG00000170312	CDK1	0.00213696	15856
ENSG00000115163	CENPA	0.00279515	15844
ENSG00000164687	FABP5	0.00080168	15778
ENSG00000111110	PPM1H	0.00645193	15669
ENSG00000197632	SERPINB2	0.01326318	14831
ENSG00000150995	ITPR1	0.00769409	14761
ENSG00000124813	RUNX2	0.00001473	14757
ENSG00000176971	FIBIN	0.01272529	14381
ENSG00000254726	MEX3A	0.00017300	14358
ENSG00000102096	PIM2	0.00093743	14035
ENSG00000197646	PDCD1LG2	0.01170811	13984
ENSG00000259207	ITGB3	0.00648175	13957
ENSG00000118193	KIF14	0.00636966	13816
ENSG00000152952	PLOD2	0.00006319	13715
ENSG00000050730	TNIP3	0.00404054	13498
ENSG00000168679	SLC16A4	0.00212062	13118
ENSG00000150051	MKX	0.00001061	12801
ENSG00000171812	COL8A2	0.01530689	12742
ENSG00000135048	TMEM2	0.00436512	12558
ENSG00000171502	COL24A1	0.00000125	12508
ENSG00000140263	SORD	0.01645580	12443
ENSG00000188342	GTF2F2	0.00000000	12364
ENSG00000137269	LRRC1	0.00543204	12269
ENSG00000135916	ITM2C	0.00288275	12159
ENSG00000057019	DCBLD2	0.00000000	12142
ENSG00000140945	CDH13	0.00007483	11570
ENSG00000176697	BDNF	0.00008341	11214
ENSG00000067177	PHKA1	0.00188460	11207
ENSG00000154188	ANGPT1	0.00002689	11025
ENSG00000130066	SAT1	0.00760640	10727
ENSG00000103187	COTL1	0.00983754	10350
ENSG00000132429	POPDC3	0.00001490	10274
DOWNregulated
ENSG00000178695	KCTD12	0.00106130	-10194
ENSG00000188112	C6orf132	0.00000368	-10303
ENSG00000099377	HSD3B7	0.00134145	-10580
ENSG00000176658	MYO1D	0.00404705	-11198
ENSG00000173517	PEAK1	0.00000101	-11545
ENSG00000182179	UBA7	0.00009340	-11594
ENSG00000189320	FAM180A	0.00180989	-12136
ENSG00000138131	LOXL4	0.00469257	-12375
ENSG00000138744	NAAA	0.00357893	-12792
ENSG00000239653	PSMD6-AS2	0.00185430	-13232
ENSG00000138356	AOX1	0.00195770	-13434
ENSG00000157404	KIT	0.00002769	-13879
ENSG00000176928	GCNT4	0.00415318	-14183
ENSG00000229847	EMX2OS	0.00241163	-14284
ENSG00000266094	RASSF5	0.00012660	-14698
ENSG00000116667	C1orf21	0.00005050	-15643
ENSG00000139132	FGD4	0.00322221	-17180
ENSG00000152117	AC073869.1	0.00144781	-17284
ENSG00000228784	LINC00954	0.00041045	-17334
ENSG00000153993	SEMA3D	0.00004346	-17822
ENSG00000206538	VGLL3	0.00000000	-18117
ENSG00000196935	SRGAP1	0.00000972	-19512
ENSG00000204682	CASC10	0.00032805	-20733
ENSG00000035664	DAPK2	0.00001064	-20752
ENSG00000149292	TTC12	0.00930174	-21262
ENSG00000172348	RCAN2	0.00062630	-21702
ENSG00000287733	novel transcript (lncRNA)	0.00002544	-21759
ENSG00000235505	AP002004.1	0.00073579	-21960
ENSG00000107738	VSIR	0.00000000	-22341
ENSG00000215386	MIR99AHG	0.00000168	-22998
ENSG00000130038	CRACR2A	0.00001310	-23839
ENSG00000110852	CLEC2B	0.00000106	-24671
ENSG00000258479	LINC00640	0.00278439	-26137
ENSG00000091831	ESR1	0.00000033	-26370
ENSG00000176771	NCKAP5	0.00041109	-28014
ENSG00000133083	DCLK1	0.00000099	-28172
ENSG00000287516	novel transcript (lncRNA)	0.00005411	-28253
ENSG00000171840	NINJ2	0.00000002	-28859
ENSG00000003400	CASP10	0.00032486	-30075
ENSG00000198483	ANKRD35	0.00000000	-31637
ENSG00000101265	RASSF2	0.00000000	-32207
ENSG00000150594	ADRA2A	0.00013274	-33274
ENSG00000136869	TLR4	0.00058424	-35545
ENSG00000102802	MEDAG	0.00000326	-37459
ENSG00000185742	C11orf87	0.00000298	-40083
ENSG00000155011	DKK2	0.00014551	-40656
ENSG00000189058	APOD	0.00006002	-42130
ENSG00000174611	KY	0.00000000	-42483
ENSG00000064205	WISP2	0.00000004	-44203
ENSG00000108381	ASPA	0.00101640	-48129
ENSG00000006016	CRLF1	0.00067991	-50286
ENSG00000241644	INMT	0.00256196	-50410
ENSG00000255399	TBX5-AS1	0.00000000	-54574
ENSG00000164530	PI16	0.00129264	-63849
ENSG00000089225	TBX5	0.00000000	-69819
ENSG00000116194	ANGPTL1	0.00000366	-70837

## Sheet: Suppl. Table 6
Supplementary Table 6. Significantly enriched REACTOME categories
ID	Description	pvalue	p.adjust	qvalue	Gene symbol	Gene Count
REACTOME
R-HSA-2500257	Resolution of Sister Chromatid Cohesion	0.0000927	0.0223995	0.0212078	CENPA,KIF18A,NUF2,CENPU,BUB1B,CDK1	6
R-HSA-141424	Amplification of signal from the kinetochores	0.0002435	0.0223995	0.0212078	CENPA,KIF18A,NUF2,CENPU,BUB1B	5
R-HSA-69618	Mitotic Spindle Checkpoint	0.0005179	0.0332646	0.0314948	CENPA,KIF18A,NUF2,CENPU,BUB1B	5
R-HSA-1474290	Collagen formation	0.0001799	0.0223995	0.0212078	P3H2, LOXL4,PLOD2,COL24A1,COL8A2	5
GO Cellular Components
GO:0000776	Kinetochore	0.0001378	0.0130901	0.0123286	RASSF2,CENPA,KIF18A,NUF2,CENPU, BUB1B	6
GO:0000775	Chromosome, centromeric region	0.0009309	0.0294791	0.0277642	RASSF2,CENPA,KIF18A,NUF2,CENPU, BUB1B	6

## Sheet: Suppl. Table 7
Supplementary Table 7. List of fibroblsat cell lines.
Cell line code	Group	MAGEL2 mutation	Age (years)	Sex
063	SYS	c.1912C>T (p.Gln638*)	16-20	Female
122	SYS	c.1850G>A (p.Trp617*)	0-5	Male
066	SYS	c.1996dupC (p.Gln666Profs*47)	6-10	Male
068	SYS	c.1996dupC (p.Gln666Profs*47)	6-10	Female
132	SYS	c.3019 C>T (p.Gln1007*)	11-15	Female
136	SYS	c.2056_2066del (p.Trp686Alafs*23)	6-10	Male
137	SYS	c.2108_2109del (p.Ala703Glyfs*9)	0-5	Male
SR49.3	SYS	c.2012C>A (p.Ser671*)	Adult	Female
124	PWS	Paternal deletion	0-5	Male
95	PWS	Maternal uniparental disomy	16-20	Male
972	PWS	Maternal uniparental disomy	11-15	Male
915	PWS	Imprinting defect	6-10	Female
745	PWS	Paternal deletion	6-10	Female
256	PWS	Paternal deletion	0-5	Male
334	PWS	Maternal uniparental disomy	6-10	Female
814	PWS	Paternal deletion	6-10	Female
411	PWS	Paternal deletion	11-15	Female
000025F0	Control	-	Adult	Male
15243F	Control	-	Adult	Male
FO55	Control	-	Adult	Female
FO56	Control	-	Adult	Male
23115A	Control	-	Adult	Female
23115B	Control	-	16-20	Male
121	Control	-	Adult	Male
120	Control	-	11-15	Male
133	Control	-	Adult	Female
135	Control	-	11-15	Female
589	Control	-	Adult	Male
Adult: >21 years old
